# Supplementary material for: High-efficiency nitrate electroreduction to ammonia on electrodeposited cobalt–phosphorus alloy film
Source: Royal Society of Chemistry journal article supplement (doi:10.1039/d1cc02612g), 2021-01-01
Supplement: d1cc02612g1.pdf [file d1cc02612g1.pdf]

## Electronic Supplementary Information

### Experimental Section

**Materials:** Sodium nitrate ( $\text{NaNO}_3$ , 99.0%), sodium nitrite ( $\text{NaNO}_2$ , 99.0%), sodium sulfate ( $\text{Na}_2\text{SO}_4$ ), ammonium chloride ( $\text{NH}_4\text{Cl}$ ), sodium hydroxide ( $\text{NaOH}$ ), sodium salicylate ( $\text{C}_7\text{H}_5\text{NaO}_3$ ), trisodium citrate dihydrate ( $\text{C}_6\text{H}_5\text{Na}_3\text{O}_7 \cdot 2\text{H}_2\text{O}$ ), p-dimethylaminobenzaldehyde ( $\text{C}_9\text{H}_{11}\text{NO}$ ), sodium nitroferricyanide dihydrate ( $\text{C}_5\text{FeN}_6\text{Na}_2\text{O} \cdot 2\text{H}_2\text{O}$ ),  $\text{Na}^{15}\text{NO}_3$ , deuterium oxide ( $\text{D}_2\text{O}$ ), 0.8 wt% sulfamic acid solution ( $\text{H}_3\text{NO}_3\text{S}$ ) and sodium hypochlorite solution ( $\text{NaClO}$ ) were purchased from Aladdin Ltd. (Shanghai, China). Cobalt chloride hexahydrate ( $\text{CoCl}_2 \cdot 6\text{H}_2\text{O}$ ), and ammonium sulfate ( $(\text{NH}_4)_2\text{SO}_4$ ) were purchased from Chengdu Kelong Chemical Regent Co. Ltd. Sodium hypophosphite ( $\text{NaH}_2\text{PO}_2$ ) was bought from Shanghai Macklin Biochemical Co., Ltd. Sulfuric acid ( $\text{H}_2\text{SO}_4$ ), hydrogen peroxide ( $\text{H}_2\text{O}_2$ ), hydrochloric acid ( $\text{HCl}$ ), hydrazine monohydrate ( $\text{N}_2\text{H}_4 \cdot \text{H}_2\text{O}$ ) and ethylalcohol ( $\text{C}_2\text{H}_5\text{OH}$ ) were bought from Beijing Chemical Corporation. (China). chemical Ltd. in Chengdu. Titanium plate (0.2 mm thick) was purchased from Qingyuan Metal Materials Co., Ltd (Xingtai, China). All reagents used in this work were analytical grade without further purification.

**Preparation of Co-P/TP:** In brief,  $\text{CoCl}_2 \cdot 6\text{H}_2\text{O}$  (1.19 g),  $(\text{NH}_4)_2\text{SO}_4$  (3 g),  $\text{C}_6\text{H}_5\text{Na}_3\text{O}_7 \cdot 2\text{H}_2\text{O}$  (3 g) and  $\text{NaH}_2\text{PO}_2$  (3 g) were dissolved in 50 mL ultrapure water as the electroplating solution. Then, a piece of TP ( $1 \times 1 \text{ cm}^2$ ) as the working electrode was polarized at  $-1.0 \text{ V}$  (vs. SCE) in the above solution for 30 min, with the use of a carbon rod as the auxiliary electrode and a SCE as the reference electrode to obtain Co-P/TP.

**Characterizations:** XRD data were acquired by a LabX XRD-6100 X-ray diffractometer with a  $\text{Cu K}\alpha$  radiation (40 kV, 30 mA) of wavelength 0.154 nm (SHIMADZU, Japan). SEM measurements were carried out on a GeminiSEM 300 scanning electron microscope (ZEISS, Germany) at an accelerating voltage of 5 kV. XPS measurements were performed on an ESCALABMK II X-ray photoelectron spectrometer using Mg as the exciting source. The absorbance data of

spectrophotometer was measured on UV-Vis spectrophotometer. The ion chromatography data were collected on Metrohm 940 Professional IC Vario. All  $^1\text{H}$  nuclear magnetic resonance ( $^1\text{H}$  NMR) spectra were collected on Varian VNMRS 600 MHz (the USA) with water suppression.

**Electrochemical measurements:** All electrochemical measurements were carried on the CHI760E electrochemical workstation (Shanghai, Chenhua) using a standard three-electrode setup. Electrolyte solution was Ar-saturated of 0.2 M  $\text{Na}_2\text{SO}_4$  with 200 ppm  $\text{NO}_3^-$ , using Co-P/TP ( $1 \times 1 \text{ cm}^2$ ) as the working electrode, a carbon rod as the counter electrode and SCE as the reference electrode. We use a H-type electrolytic cell separated by a Nafion 117 Membrane which was protonated by boiling in ultrapure water,  $\text{H}_2\text{O}_2$  (5%) aqueous solution and 0.5 M  $\text{H}_2\text{SO}_4$  at 80 °C for another 2 h, respectively. All the potentials reported in our work were converted to reversible hydrogen electrode (RHE) scale via calibration with the following equation:  $E(\text{RHE}) = E(\text{vs. SCE}) + 0.0591 \times \text{pH} + 0.2415 \text{ V}$  and the presented current density was normalized to the geometric surface area.

**Determination of  $\text{NH}_3$  using the indophenol blue method:** Concentration of produced  $\text{NH}_3$  was determined by spectrophotometry measurement with indophenol blue method (the obtained electrolyte was diluted 100 times).<sup>1</sup> In detail, 4 mL electrolyte was obtained from the cathodic chamber and mixed with 50  $\mu\text{L}$  oxidizing solution containing  $\text{NaClO}$  (4.5%) and  $\text{NaOH}$  (0.75 M), 500  $\mu\text{L}$  coloring solution containing  $\text{C}_7\text{H}_5\text{O}_3\text{Na}$  (0.4 M) and  $\text{NaOH}$  (0.32 M), and 50  $\mu\text{L}$  catalyst solution  $\text{Na}_2\text{Fe}(\text{CN})_5\text{NO} \cdot 2\text{H}_2\text{O}$  (1 wt%) for 1 h. The concentration-absorbance curve was calibrated using the standard  $\text{NH}_4\text{Cl}$  solution with  $\text{NH}_3$  concentrations of 0.0, 0.05, 0.10, 0.15, 0.20, 0.25 and 0.50  $\mu\text{g mL}^{-1}$  in 0.2 M  $\text{Na}_2\text{SO}_4$ . These solutions were identified via UV-Vis spectroscopy at the wavelength of 660 nm. The concentration-absorbance curves were calibrated using standard  $\text{NH}_3$  solution with a series of concentrations. The fitting curve ( $y = 0.62334x + 0.02668$ ,  $R^2 = 0.99983$ ) shows good linear relation of absorbance value with  $\text{NH}_3$  concentration.

**Determination of NH<sub>3</sub> using the <sup>1</sup>H NMR spectroscopy:** The amount of produced NH<sub>3</sub> was also determined by the <sup>1</sup>H NMR spectroscopy. After chronoamperometry tests in Ar-saturated 0.2 M Na<sub>2</sub>SO<sub>4</sub> with 200 ppm NO<sub>3</sub><sup>-</sup> at -0.6 V vs. RHE for 2h, the pH of the post-electrolysis electrolyte was adjusted to be 2 with a 0.5 M HCl solution. Then, 0.5 mL of electrolyte and 0.05 mL of deuterium oxide (D<sub>2</sub>O) were added into the NMR tube for further NMR (600 MHz) detection. The isotopic labeling experiment was conducted to confirm the origin of ammonium using Ar-saturated 0.2 M Na<sub>2</sub>SO<sub>4</sub> with 200 ppm <sup>15</sup>NO<sub>3</sub><sup>-</sup> as the electrolyte in the same operation described above.

**Determination of NO<sub>3</sub><sup>-</sup>:** The amount of NO<sub>3</sub><sup>-</sup> was analyzed by spectrophotometry.<sup>2</sup> Firstly, 1.0 mL electrolyte was taken out from the electrolytic cell and diluted to 5 mL to detection range. Then, 0.1 mL 1 M HCl and 0.01 mL 0.8 wt% H<sub>3</sub>NO<sub>3</sub>S solution were added into the aforementioned solution. After 15 minutes, the absorbance was detected by UV-Vis spectrophotometry at a wavelength of 220 nm and 275 nm. The final absorbance of NO<sub>3</sub><sup>-</sup> was calculated based on the following equation:  $A = A_{220\text{nm}} - 2A_{275\text{nm}}$ . The calibration curve can be obtained through different concentrations of NaNO<sub>3</sub> solutions and the corresponding absorbance. The fitting curve ( $y = 0.05841x + 0.0027$ ,  $R^2 = 0.99936$ ) shows good linear relation of absorbance value with NO<sub>3</sub><sup>-</sup> concentration.

**Determination of N<sub>2</sub>H<sub>4</sub>:** In this work, we used the method of Watt and Chrisp<sup>3</sup> to estimate whether N<sub>2</sub>H<sub>4</sub> produced. The chromogenic reagent was a mixed solution of 5.99 g C<sub>9</sub>H<sub>11</sub>NO, 30 mL HCl and 300 mL C<sub>2</sub>H<sub>5</sub>OH. In detail, 1 mL electrolyte was added into 1 mL prepared color reagent and stirred 15 min in the dark. The absorbance at 455 nm was measured to quantify the N<sub>2</sub>H<sub>4</sub> concentration with a standard curve of hydrazine ( $y = 0.65546x + 0.0556$ ,  $R^2 = 0.99998$ ).

**Calculations of the conversion rate, FE and NH<sub>3</sub> yield rate:**

The conversion rate of NO<sub>3</sub><sup>-</sup> is calculated using the following equation:

$$\text{Conversion rate} = \Delta[\text{NO}_3^-] / [\text{NO}_3^-] \times 100\% \quad (1)$$

FE toward  $\text{NH}_3$  via  $\text{NO}_3^-$  reduction reaction ( $\text{NO}_3^-$ -RR) was calculated by the following equation:

$$\text{FE} = (8 \times F \times [\text{NH}_3] \times V) / (M_{\text{NH}_3} \times Q) \times 100\% \quad (2)$$

FE toward  $\text{NH}_3$  via  $\text{NO}_2^-$ -RR was calculated by the following equation:

$$\text{FE} = (6 \times F \times [\text{NH}_3] \times V) / (M_{\text{NH}_3} \times Q) \times 100\% \quad (3)$$

(Note that the reduction of  $\text{NO}_3^- / \text{NO}_2^-$  to  $\text{NH}_3$  consumes eight / six electrons.)

$\text{NH}_3$  yield rate is calculated using the following equation:

$$\text{NH}_3 \text{ yield rate} = ([\text{NH}_3] \times V) / (M_{\text{NH}_3} \times t \times A) \quad (4)$$

Where  $F$  is the Faradic constant ( $96485 \text{ C mol}^{-1}$ ),  $[\text{NH}_3]$  is the measured  $\text{NH}_3$  concentration,  $[\text{NO}_3^-]$  is the initial concentration of  $\text{NO}_3^-$ ,  $\Delta[\text{NO}_3^-]$  is the concentration difference of  $\text{NO}_3^-$  before and after electrolysis,  $V$  is the volume of electrolyte in the anode compartment (35 mL),  $M_{\text{NH}_3}$  is the molar mass of  $\text{NH}_3$ ,  $Q$  is the total quantity of applied electricity;  $t$  is the electrolysis time and  $A$  is the loaded area of catalyst ( $1 \times 1 \text{ cm}^2$ ).

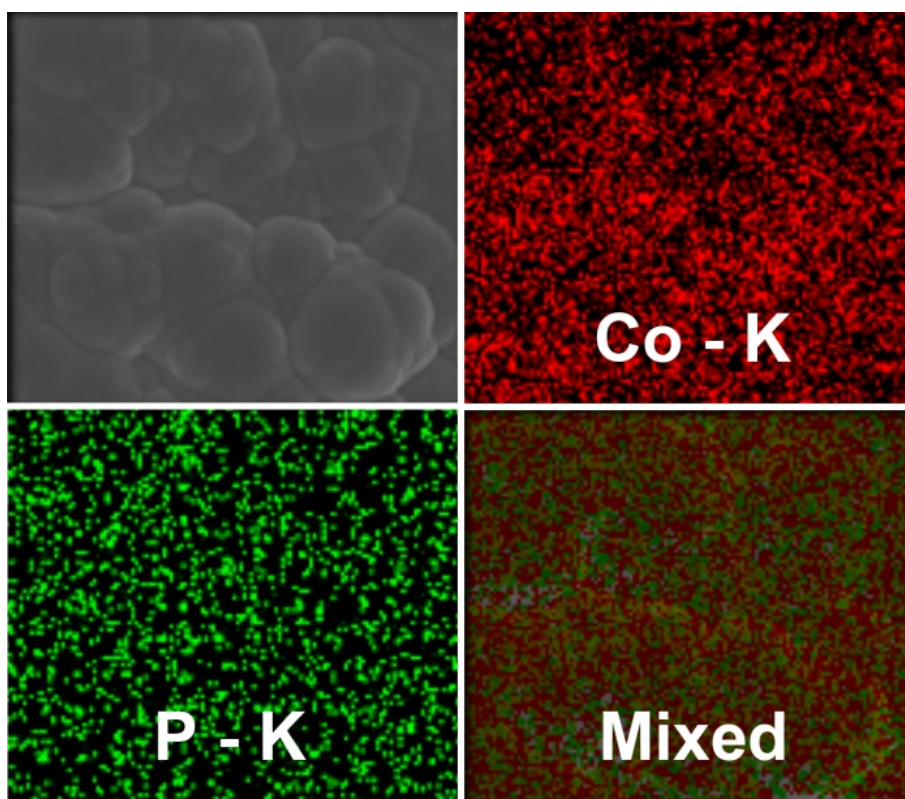

**Fig. S1.** SEM and EDX elemental mapping images of Co-P/TP.

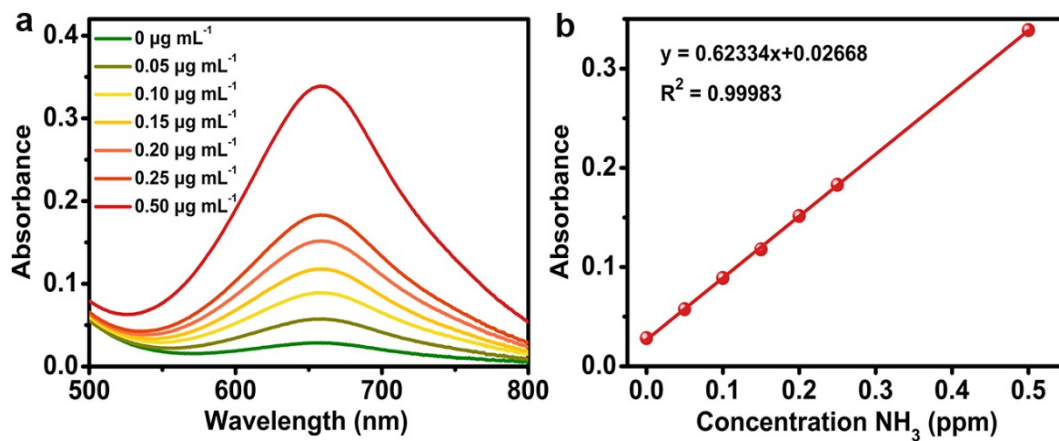

**Fig. S2.** (a) UV-Vis absorption spectra and corresponding (b) calibration curve used for calculation of  $\text{NH}_3$  concentration.

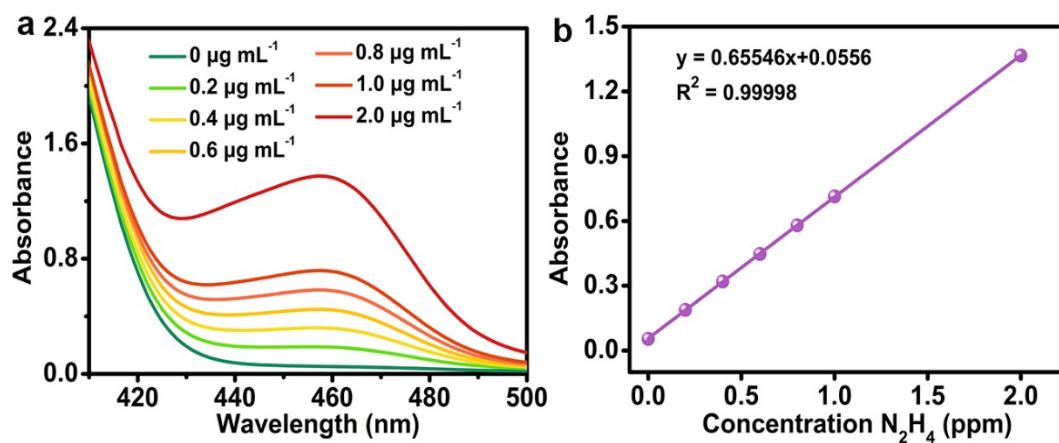

**Fig. S3.** (a) UV-Vis absorption spectra and corresponding (b) calibration curve used for calculation of  $N_2H_4$  concentration.

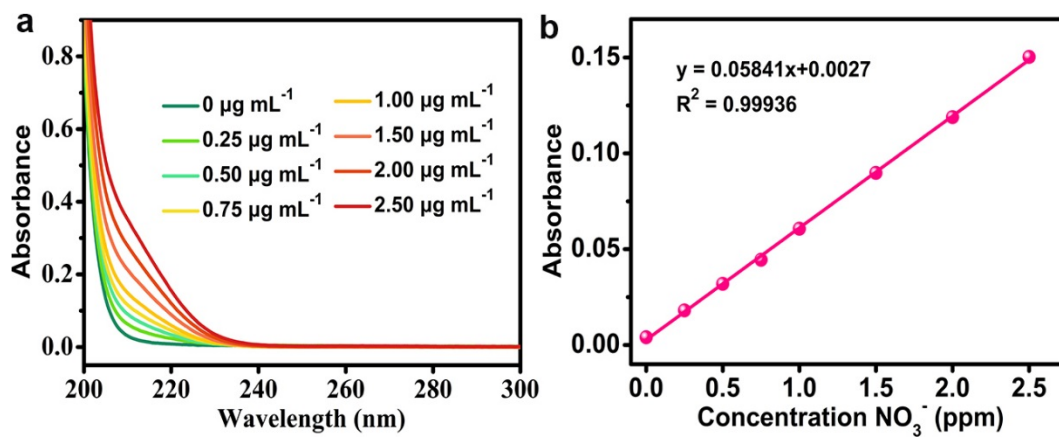

**Fig. S4.** (a) UV-Vis absorption spectra and corresponding (b) calibration curve used for calculation of  $\text{NO}_3^-$  concentration.



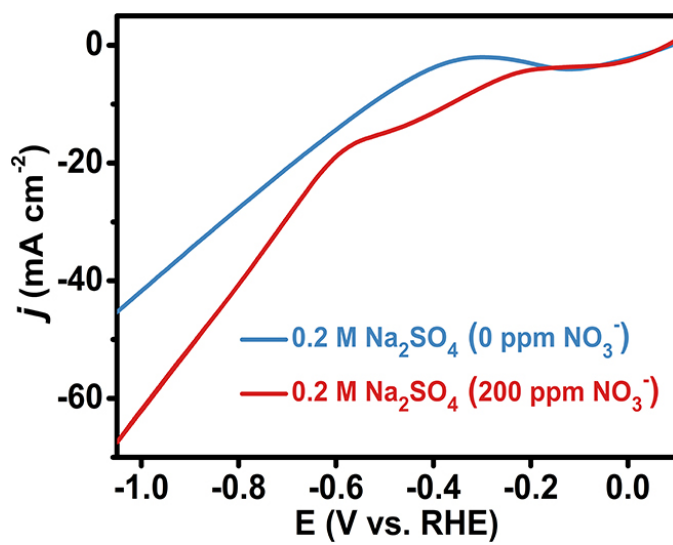

**Fig. S5.** LSV curves of Co-P/TP tested in 0.2 M Na<sub>2</sub>SO<sub>4</sub> with and without 200 ppm NO<sub>3</sub><sup>-</sup>.

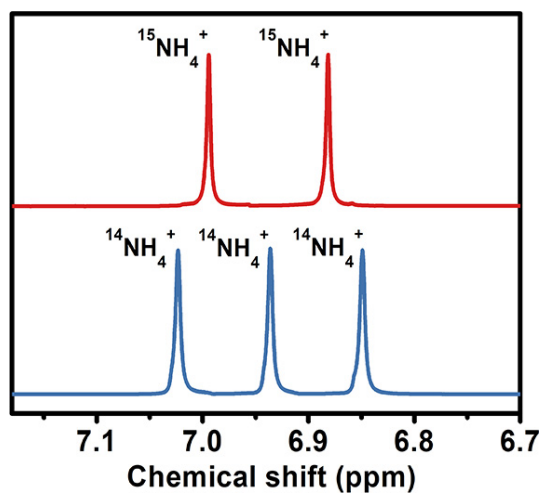

**Fig. S6.**  $^1\text{H}$  NMR spectrum for the products using  $\text{Na}^{14}\text{NO}_3$  and  $\text{Na}^{15}\text{NO}_3$  as nitrogen sources.

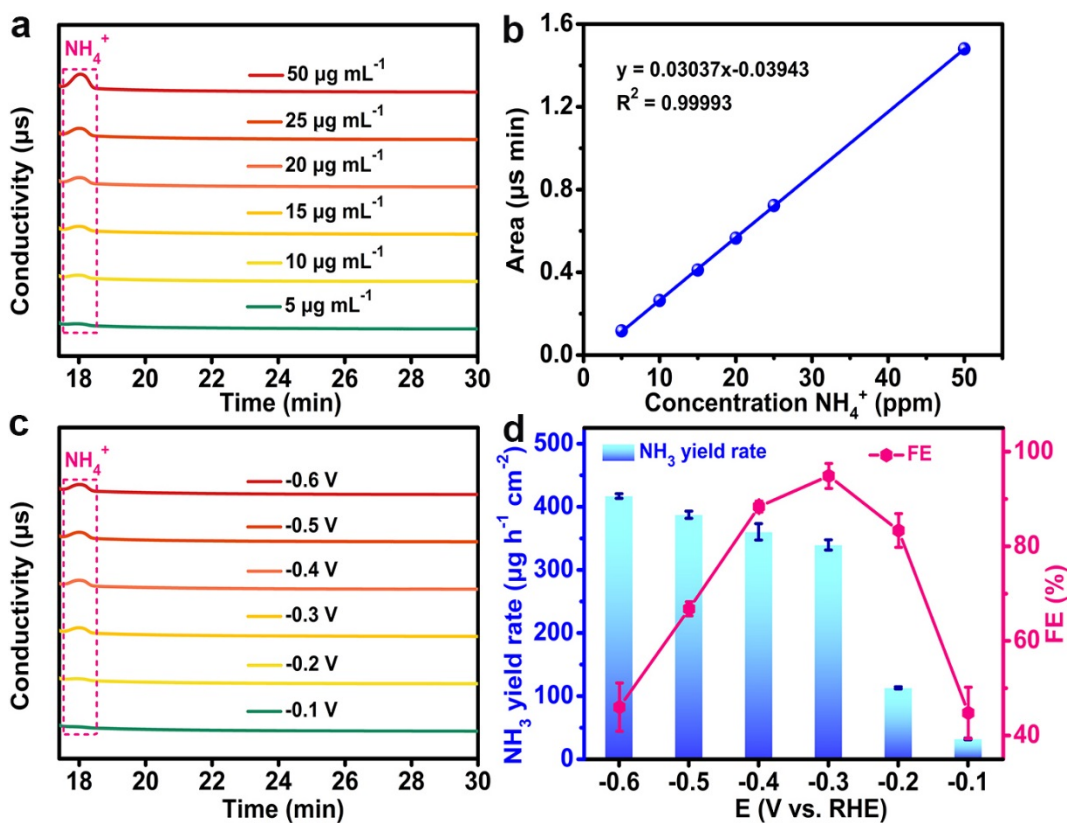

**Fig. S7.** (a) Ion chromatograms of  $\text{NH}_4^+$  with different concentrations in 0.2 M  $\text{Na}_2\text{SO}_4$  and (b) corresponding standard curve. (c) Ion chromatograms for the electrolytes at a series of potentials after 2 h electrolysis. (d)  $\text{NH}_3$  yield rates and FEs of Co-P/TP at corresponding potentials.

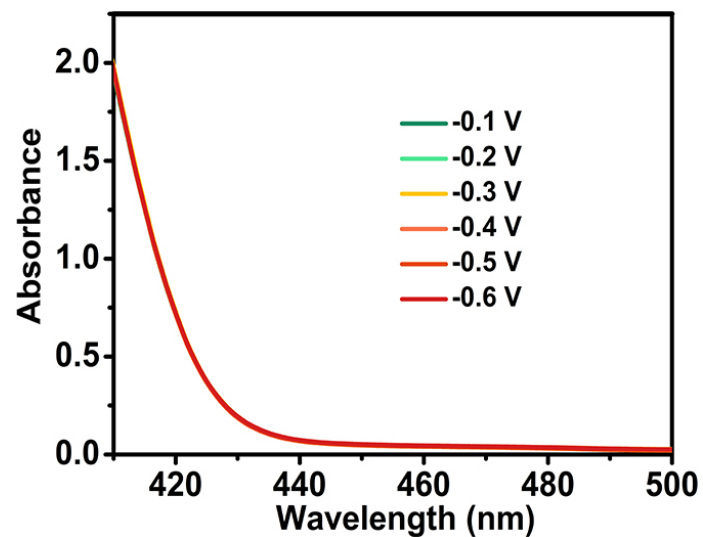

**Fig. S8.** UV-Vis absorption spectra of the electrolytes estimated by the method of Watt and Chrisp after 2 h electrolysis at each given potential under ambient conditions.

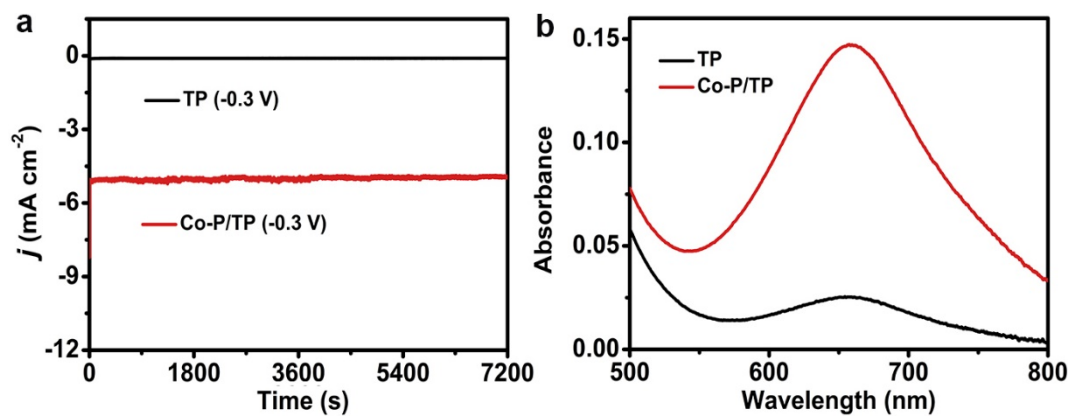

**Fig. S9.** (a) Time-dependent current density curves of Co-P/TP and bare TP for NO<sub>3</sub><sup>-</sup> RR at -0.3 V vs. RHE in 0.2 M Na<sub>2</sub>SO<sub>4</sub> with 200 ppm NO<sub>3</sub><sup>-</sup>. (b) UV-Vis absorption spectra of the electrolytes stained with indophenol indicator after NO<sub>3</sub><sup>-</sup> RR electrolysis.

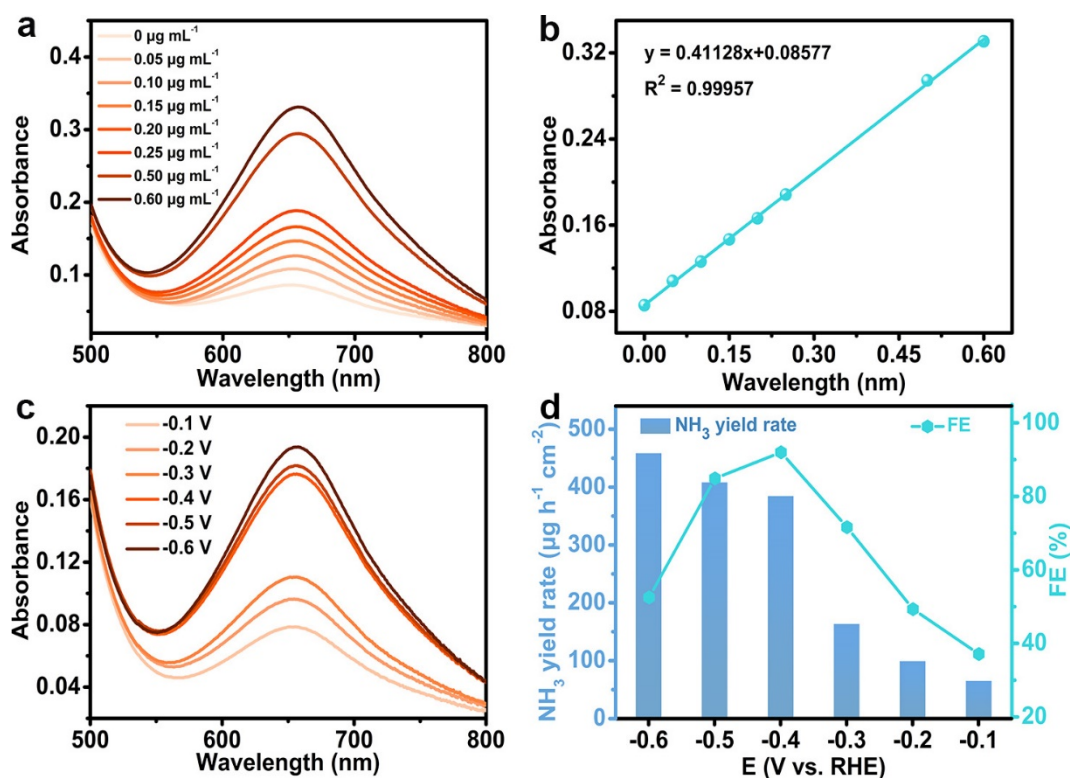

**Fig. S10.** (a) UV-Vis absorption spectra and corresponding (b) calibration curve used for calculation of NH<sub>3</sub> concentration. Electrochemical tests of Co-P/TP in a two-compartment cell toward NO<sub>3</sub><sup>-</sup>RR in 0.2 M PBS with 200 ppm NO<sub>3</sub><sup>-</sup> (c) UV-Vis absorption spectra of NH<sub>3</sub>. (d) Calculated FEs and NH<sub>3</sub> yield rates of Co-P/TP toward NO<sub>3</sub><sup>-</sup>RR at different given potentials.

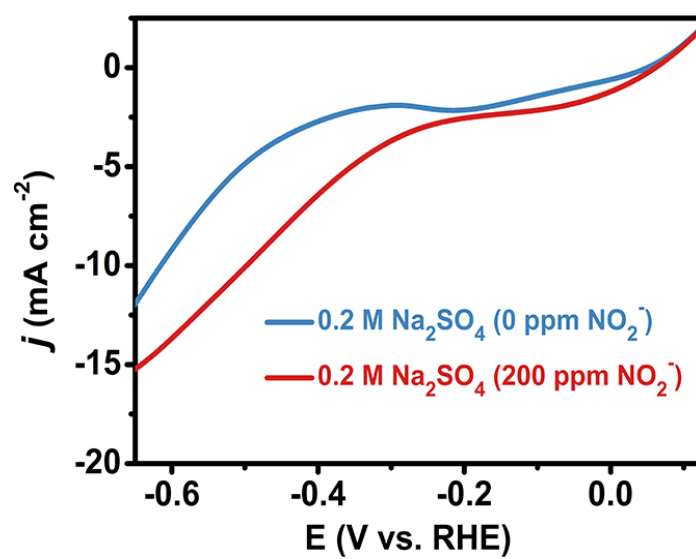

**Fig. S11.** LSV curves of Co-P/TP tested in 0.2 M Na<sub>2</sub>SO<sub>4</sub> with and without 200 ppm NO<sub>2</sub><sup>-</sup>.

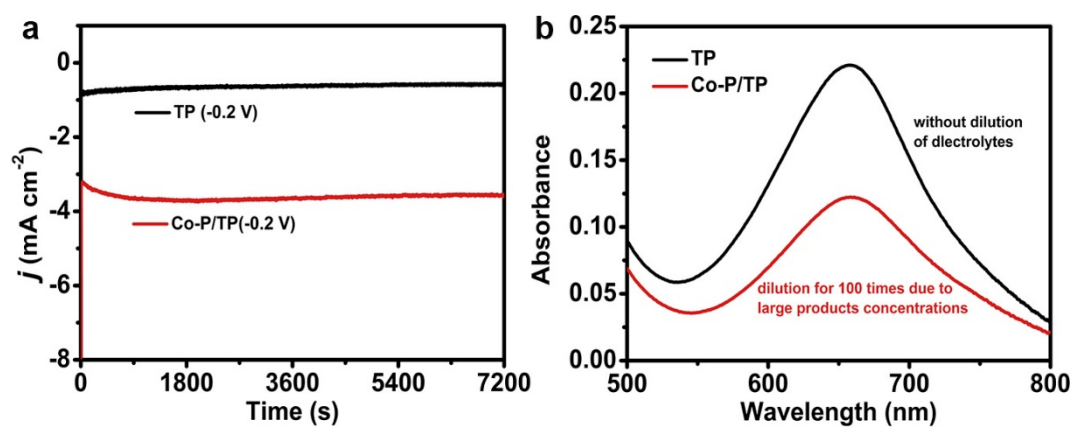

**Fig. S12.** (a) Time-dependent current density curves of Co-P/TP and bare TP for NO<sub>2</sub><sup>-</sup>RR at -0.2 V in 0.2 M Na<sub>2</sub>SO<sub>4</sub> with 200 ppm NO<sub>2</sub><sup>-</sup>. (b) UV-Vis absorption spectra of the electrolytes stained with indophenol indicator after NO<sub>2</sub><sup>-</sup>RR electrolysis.



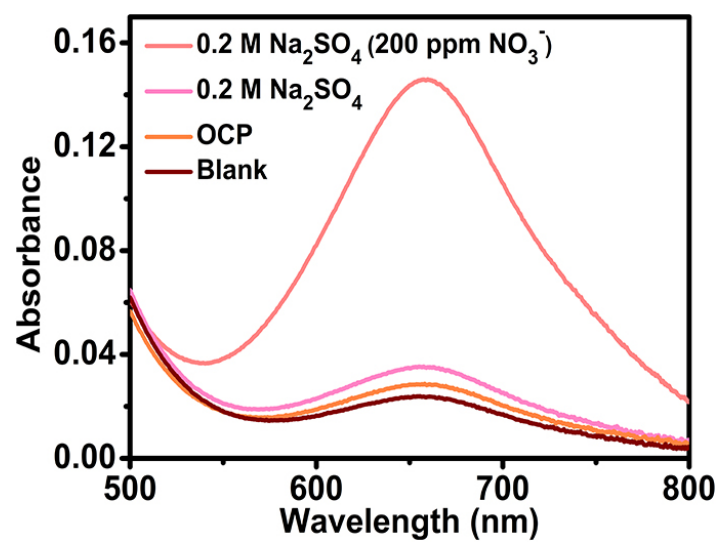

**Fig. S13.** UV-Vis absorption spectra for different operating conditions.

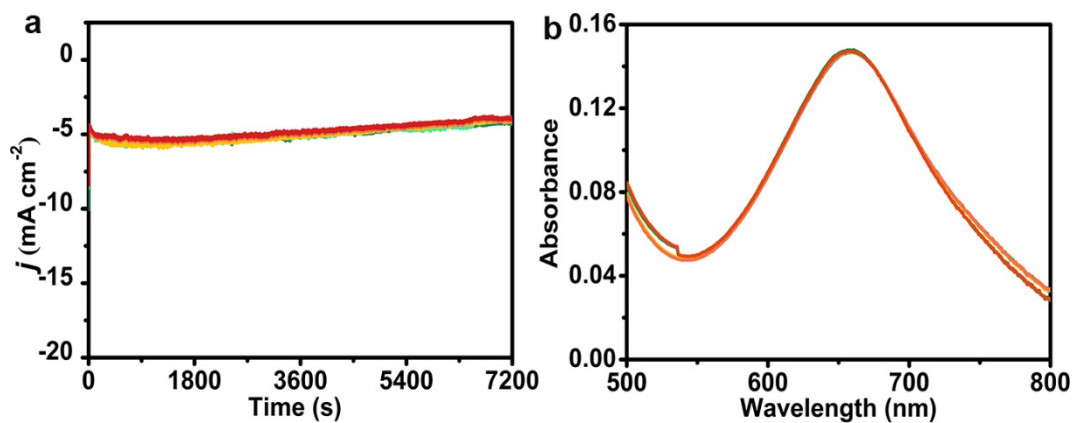

**Figure S14.** (a) Chronoamperometry curves for Co-P/TP during recycling tests toward NO<sub>3</sub><sup>-</sup>RR at -0.3 V in 0.2 M Na<sub>2</sub>SO<sub>4</sub> with 200 ppm NO<sub>3</sub><sup>-</sup>. (b) UV-Vis absorption spectra for NH<sub>3</sub> and during recycling tests for NO<sub>3</sub><sup>-</sup>RR at -0.3 V in 0.2 M Na<sub>2</sub>SO<sub>4</sub> with 200 ppm NO<sub>3</sub><sup>-</sup>.

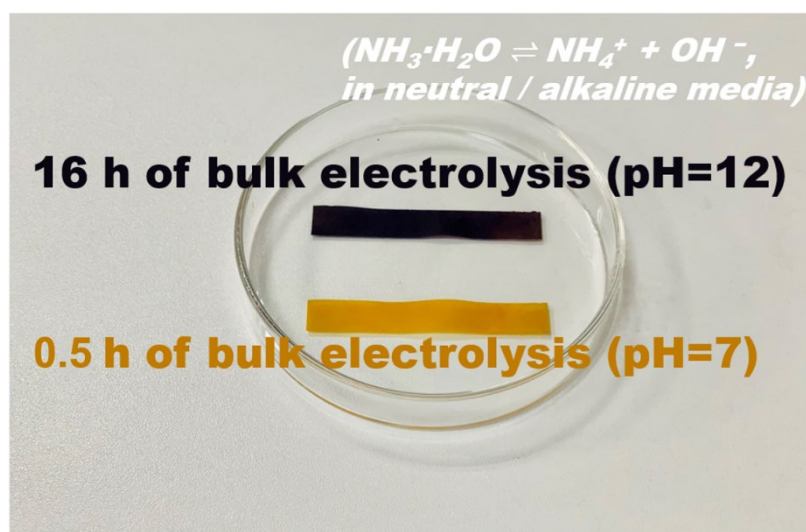

**Fig. S15.** Photographs of pH test strips with 0.5 h of bulk electrolysis and 16 h of bulk electrolysis.

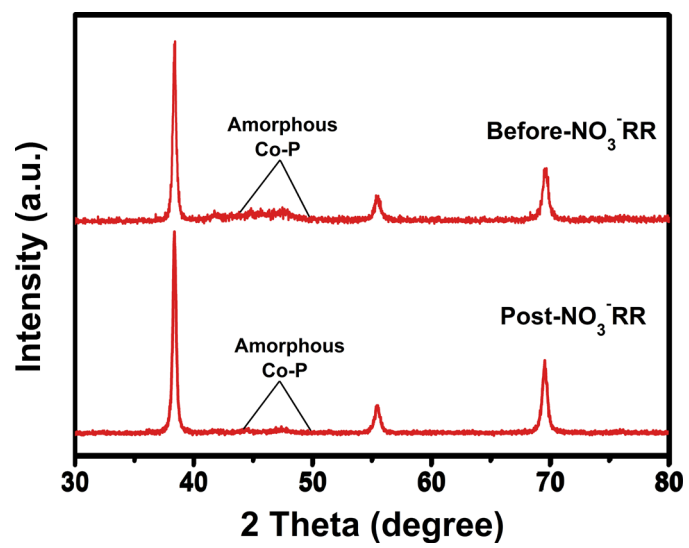

Fig. S16. XRD patterns for Co-P/TP before and after NO<sub>3</sub><sup>-</sup>RR.

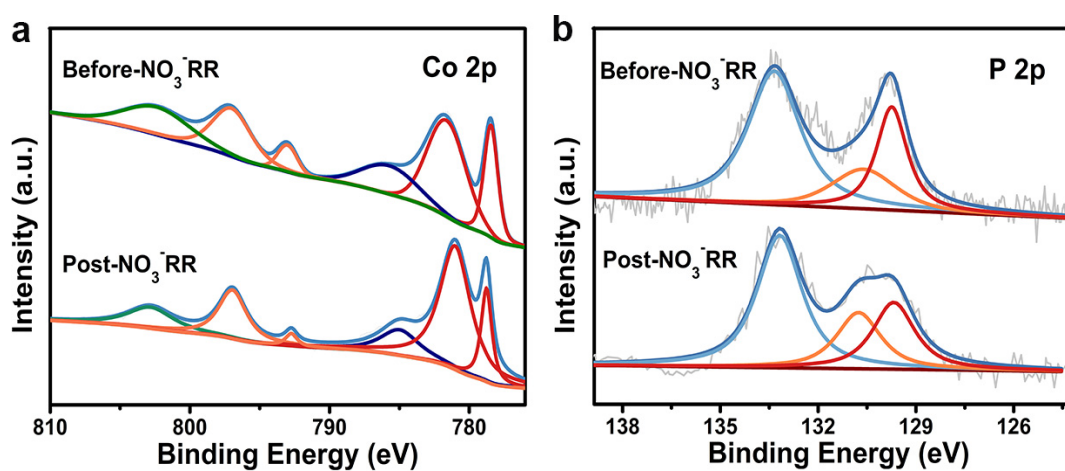

**Fig. S17.** XPS spectra in the Co 2p and P 2p regions for Co-P/TP before and after  $\text{NO}_3^-$ RR.

**Table S1.** Comparison of catalytic performances of Co-P/TP with other reported NO<sub>3</sub><sup>-</sup>RR electrocatalysts.

| Catalyst                                    | Electrolyte                                                                      | Performance                                                                                                                                                                                                 | Ref.      |
|---------------------------------------------|----------------------------------------------------------------------------------|-------------------------------------------------------------------------------------------------------------------------------------------------------------------------------------------------------------|-----------|
| Co-P/TP                                     | 0.2 M Na <sub>2</sub> SO <sub>4</sub><br>(200 ppm NO <sub>3</sub> <sup>-</sup> ) | NH <sub>3</sub> yield rate: 416.0 ± 7.2 μg h <sup>-1</sup> cm <sup>-2</sup> (-0.6 V), FE <sub>NH<sub>3</sub></sub> : 93.6 ± 3.3% (-0.3 V), Conversion rate <sub>NH<sub>3</sub></sub> : 86.9% (-0.3 V, 10 h) | This work |
| Cu nanosheets                               | 0.1 M KOH                                                                        | NH <sub>3</sub> yield rate: 390.1 μg h <sup>-1</sup> mg <sup>-1</sup><br>FE <sub>NH<sub>3</sub></sub> : 99.7%                                                                                               | 4         |
| PTCDA/O-Cu                                  | 0.1 M PBS<br>(500 ppm NO <sub>3</sub> <sup>-</sup> )                             | NH <sub>3</sub> yield rate: 436 ± 85 μg h <sup>-1</sup> cm <sup>-2</sup><br>FE <sub>NH<sub>3</sub></sub> : 85.9%                                                                                            | 5         |
| Pd-In/c-Al <sub>2</sub> O <sub>3</sub>      | 3.28 mM NaHCO <sub>3</sub><br>with nitrate-reservoir                             | FE <sub>NH<sub>3</sub></sub> : 71.5%                                                                                                                                                                        | 6         |
| Co <sub>3</sub> O <sub>4</sub> @NiO<br>HNTs | 0.5 M Na <sub>2</sub> SO <sub>4</sub><br>(200 ppm NO <sub>3</sub> <sup>-</sup> ) | NH <sub>3</sub> yield rate: 6.93 mmol h <sup>-1</sup> g <sup>-1</sup><br>FE <sub>NH<sub>3</sub></sub> : 54.97%                                                                                              | 7         |
| NiPc complex                                | 0.1 M KOH, in the<br>presence of NO <sub>3</sub> <sup>-</sup>                    | FE <sub>NH<sub>3</sub></sub> : 85%                                                                                                                                                                          | 8         |
| Cu                                          | 1 M NaOH<br>(0.1 M NaNO <sub>3</sub> )                                           | FE <sub>NH<sub>3</sub></sub> : 79%                                                                                                                                                                          | 9         |
| Cu <sub>50</sub> Ni <sub>50</sub>           | 1 M KOH<br>(10 mM KNO <sub>3</sub> )                                             | FE <sub>NH<sub>3</sub></sub> : 84 ± 2%                                                                                                                                                                      | 10        |
| Ti/GC                                       | KOH<br>(~0.1 to 0.6 M NO <sub>3</sub> <sup>-</sup> )                             | FE <sub>NH<sub>3</sub></sub> : 82%                                                                                                                                                                          | 11        |
| NTEs                                        | NaCl<br>(0.65 mM NaNO <sub>3</sub> )                                             | FE <sub>NH<sub>3</sub></sub> : 5.6%                                                                                                                                                                         | 12        |

**Table S2.** Comparison of the catalytic performances of Co–P/TP with other reported NO<sub>2</sub><sup>–</sup>RR electrocatalysts under ambient conditions.

| Catalyst                                                                 | Electrolyte                                                                      | Performance                                                                                                                                | Ref.      |
|--------------------------------------------------------------------------|----------------------------------------------------------------------------------|--------------------------------------------------------------------------------------------------------------------------------------------|-----------|
| Co–P/TP                                                                  | 0.2 M Na <sub>2</sub> SO <sub>4</sub><br>(200 ppm NO <sub>2</sub> <sup>–</sup> ) | NH <sub>3</sub> yield rate: 661.0 ± 20.1 μg h <sup>–1</sup> cm <sup>–2</sup> (–0.6 V), FE <sub>NH<sub>3</sub></sub> : 93.3 ± 3.2% (–0.2 V) | This work |
| MnO <sub>2</sub> nanoarrays                                              | 0.1 M Na <sub>2</sub> SO <sub>4</sub> (NaNO <sub>2</sub> )                       | NH <sub>3</sub> yield rate: 3.09 × 10 <sup>–11</sup> mol s <sup>–1</sup> cm <sup>–2</sup> ,<br>FE <sub>NH<sub>3</sub></sub> : 6%           | 13        |
| Cobalt-tripeptide complex                                                | 1.0 M MOPS<br>(1.0 M NaNO <sub>2</sub> )                                         | NH <sub>3</sub> yield rate: 3.01 × 10 <sup>–10</sup> mol s <sup>–1</sup> cm <sup>–2</sup> ,<br>FE <sub>NH<sub>3</sub></sub> : 90 ± 3%      | 14        |
| Poly-NiTRP complex                                                       | 0.1 M NaClO <sub>4</sub> (NaNO <sub>2</sub> )                                    | NH <sub>3</sub> yield rate: 1.1 mM                                                                                                         | 15        |
| Cu phthalocyanine complexes                                              | 0.1 M KOH (NaNO <sub>2</sub> )                                                   | FE <sub>NH<sub>3</sub></sub> : 78%                                                                                                         | 16        |
| [Co(DIM)Br <sub>2</sub> ] <sup>+</sup><br>(Carbon rod working electrode) | 0.1 M solution of NaNO <sub>2</sub>                                              | FE <sub>NH<sub>3</sub></sub> : 88%                                                                                                         | 17        |
| Cu <sub>80</sub> Ni <sub>20</sub>                                        | 1.0 M NaOH<br>(20 mM NaNO <sub>2</sub> )                                         | FE <sub>NH<sub>3</sub></sub> : 87.6%                                                                                                       | 18        |

## References

- 1 D. Zhu, L. Zhang, R. E. Ruther and R. J. Hamers, *Nat. Mater.*, 2013, **12**, 836–841.
- 2 Y. Wang, W. Zhou, R. Jia, Y. Yu and B. Zhang, *Angew. Chem. Int. Ed.*, 2020, **132**, 5388–5392.
- 3 G. W. Watt and J. D. Chrisp, *Anal. Chem.*, 1952, **24**, 2006–2008.
- 4 X. Fu, X. Zhao, X. Hu, K. He, Y. Yu, T. Li, Q. Tu, X. Qian, Q. Yue, M. Wasielewski and Y. Kang, *Appl. Mater. Today*, 2020, **19**, 100620.
- 5 G. Chen, Y. Yuan, H. Jiang, S. Ren, L. Ding, L. Ma, T. Wu, J. Lu and H Wang, *Nat. Energy*, 2020, **5**, 605–613.
- 6 B. P. Chaplin, J. R. Shapley and C. J. Werth, *Catal. Lett.*, 2009, **130**, 56–62.
- 7 Y. Wang, C. Liu, B. Zhang and Y. Yu, *Sci. China Mater.*, 2020, **63**, 2530–2538.
- 8 N. Chebotareva and T. Nyokong, *J. Appl. Electrochem.*, 1997, **27**, 975–981.
- 9 D. Reyter, G. Chamoulaud, D. Bélanger and L. Roué, *J. Electroanal. Chem.*, 2006, **596**, 13–24.
- 10 Y. Wang, A. Xu, Z. Wang, L. Huang, J. Li, F. Li, J. Wicks, M. Luo, D. H. Nam, C. Tan, Y. Ding, J. Wu, Y. Lum, C. T. Dinh, D. Sinton, G. Zheng and E. H. Sargent, *J. Am. Chem. Soc.*, 2020, **142**, 5702–5708.
- 11 J. M. McEnaney, S. J. Blair, A. C. Nielander, J. A. Schwalbe, D. M. Koshy, M. Cargnello and T. F. Jaramillo, *ACS Sustainable Chem. Eng.*, 2020, **8**, 2672–2681.
- 12 X. Ma, M. Li, C. Feng, W. Hu, L. Wang and X. Liu, *J. Electroanal. Chem.*, 2016, **782**, 270–277.
- 13 R. Wang, Z. Wang, X. Xiang, R. Zhang, X. Shi and X. Sun, *Chem. Commun.*, 2018, **54**, 10340–10342.
- 14 Y. Guo, J. R. Stroka, B. Kandemir, C. E. Dickerson and K. L. Bren, *J. Am. Chem. Soc.*, 2018, **140**, 16888–16892.
- 15 P. Dreyse, M. Isaacs, K. Calfumán, C. Cáceres, A. Aliaga, M. J. Aguirre and



- D. Villagra, *Electrochim. Acta*, 2011, **56**, 5230–5237.
- 16 N. Chebotareva and T. Nyokong, *J. Appl. Electrochem.*, 1997, **27**, 975–981.
- 17 S. Xu, H. Y. Kwon, D. C. Ashley, C. H. Chen, E. Jakubikova and J. M. Smith, *Inorg. Chem.*, 2019, **58**, 9443–9451.
- 18 L. Mattarozzi, S. Cattarin, N. Comisso, P. Guerriero, M. Musiani, L. Vázquez-Gómez and E. Verlato, *Electrochim. Acta*, 2013, **89**, 488–496.
